# Supplementary material
Source: PubMed Central journal article supplement (PMC7484254)
Supplement: NIHMS1621804-supplement-1.pdf [file NIHMS1621804-supplement-1.pdf]

Father

A C A A A A T G T T A C A T T C T G T T C T T C A A G C A  
221 225 229 233 237 241 245

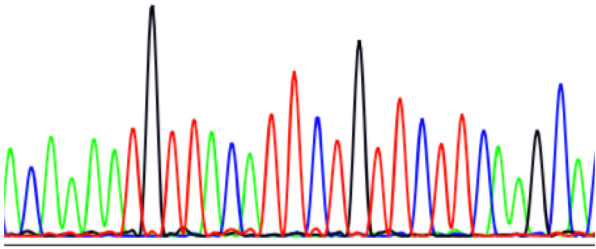

Mother

A C A A A A T G T T A C A T T C T G T T C T T C A A G C A  
221 225 229 233 237 241 245

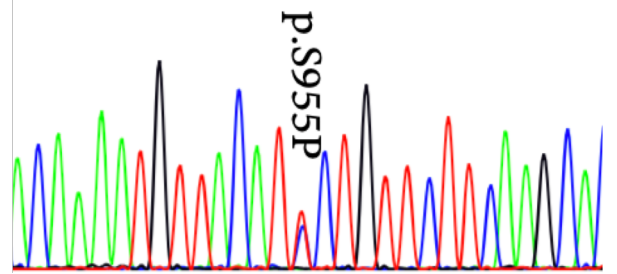

**Figure S1. Genotype analysis of the parents of the CF2 individual.** Direct Sanger sequencing of CFTR in both CF2' parents showing that the mother was a carrier of the S955P allele.
