# Supplementary material
Source: PubMed Central journal article supplement (PMC7484254)
Supplement: NIHMS1621804-supplement-2.pdf [file NIHMS1621804-supplement-2.pdf]

**Table S1. Primers used for analysis.**

|                                       | Forward Primers                  |
|---------------------------------------|----------------------------------|
| F508del allele                        | 5'-GGCACCATTAAAGAAAATATCATTGG-3' |
| "Other" allele (normal F508 codon)    | 5'-GGCACCATTAAAGAAAATATCATCTT-3' |
|                                       | Reverse Primers                  |
| "Nml" (exon 11-12 junction)           | 5'-CAAACCTGGAGATGTCCTCTTC-3'     |
| " +6nt" (retention of 6 intronic nt.) | 5'-CAAACCTGGAGATGTCCCATTA-3'     |
| "Dex12" (exon 11-13 junction)         | 5'-CAGCATCTTTGTATACTGCTCTCTTC-3' |
