# Supplementary material
Source: PubMed Central journal article supplement (PMC7484254)
Supplement: NIHMS1621804-supplement-3.pdf [file NIHMS1621804-supplement-3.pdf]

**Table S2 – Genetic alterations detected in CF2 individual.**

| Mutations                 | Polymorfisms               |
|---------------------------|----------------------------|
| c.1521_1523delCTT F508del |                            |
| c.2863T>C S955P VUS       | c.1408G>A (het) (M470V)    |
|                           | c.744-9_744-6delGATT (het) |
|                           | c.1393-61A>G (het)         |
|                           | c.869+11C>T (het)          |
|                           | c.1680-870T>A (het)        |
